# Supplementary material
Source: MDPI journal article supplement (https://www.mdpi.com/2076-3417/11/22/10883)
Supplement: s1 [file s1 › applsci-1425802-supplementary.pdf]

Supporting Information For

**Pulsed nanoelectrospray ionization boosts ion signal in whole protein mass spectrometry**

Qinwen Liu<sup>1</sup>, Ezaz Ahmed<sup>1</sup>, K.M. Mohibul Kabir<sup>1</sup>, Xiaojing Huang<sup>1</sup>, Dan Xiao<sup>2</sup>, John Fletcher<sup>2</sup> and William A. Donald<sup>1\*</sup>

*1. School of Chemistry, University of New South Wales, Sydney, NSW, 2052, Australia*

*2. School of Electrical Engineering and Telecommunications, University of New South Wales, Sydney, NSW, 2052, Australia*

\*Correspondence to be addressed to: [w.donald@unsw.edu.au](mailto:w.donald@unsw.edu.au)

|                                                                                                                                                                                                          |   |
|----------------------------------------------------------------------------------------------------------------------------------------------------------------------------------------------------------|---|
| <b>Table of Contents</b> .....                                                                                                                                                                           | 2 |
| <b>Figure S1.</b> Electrical circuit to generate high voltage pulses for pulsed nano-electrospray ionisation for mass spectrometry. ....                                                                 | 3 |
| <b>Figure S2.</b> Average charge state calculated for myoglobin by pulsed nESI mass spectrometry.....                                                                                                    | 4 |
| <b>Figure S3.</b> Signal-to-background chemical noise ( $S/N_C$ ) of (a, c) myoglobin and (b, d) angiotensin II (1 $\mu$ M) as a function of (a, b) frequency and (c, d) duty cycle of pulsed nESI. .... | 5 |
| <b>Figure S4.</b> Mass spectra of angiotensin II obtained from pulsed (a) and conventional direct current nESI (b), respectively. ....                                                                   | 6 |

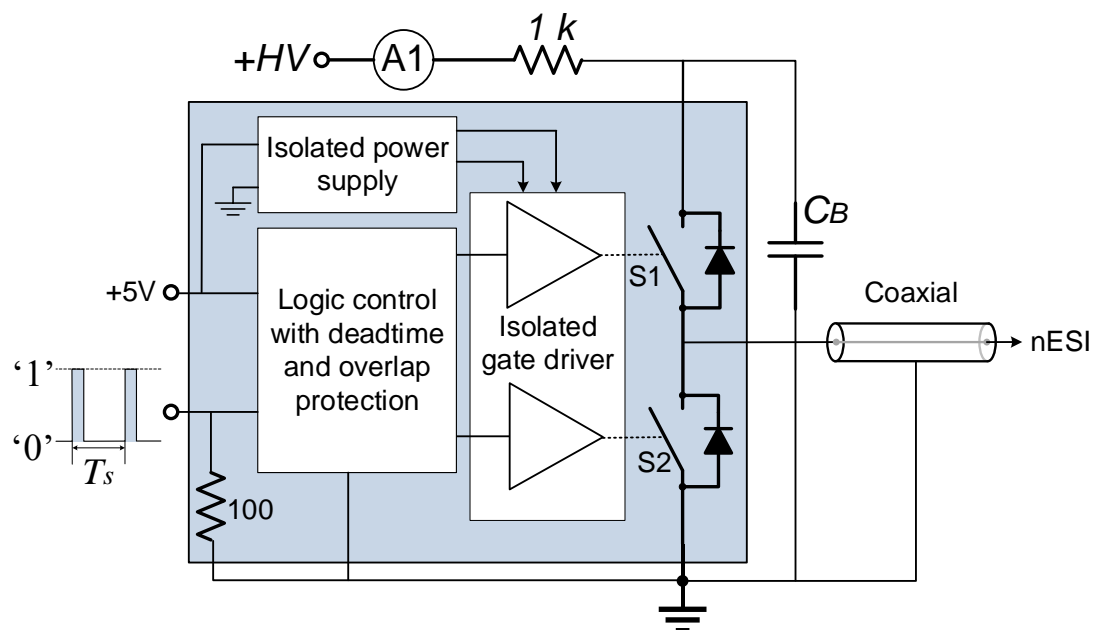

**Figure S1.** Electrical circuit to generate high voltage pulses for pulsed nano-electrospray ionisation for mass spectrometry. *HV*, *A*, *T*, *C* and *R* correspond to high voltage, ampere meter, period of waveform (time), decoupling capacitor, and resistor.

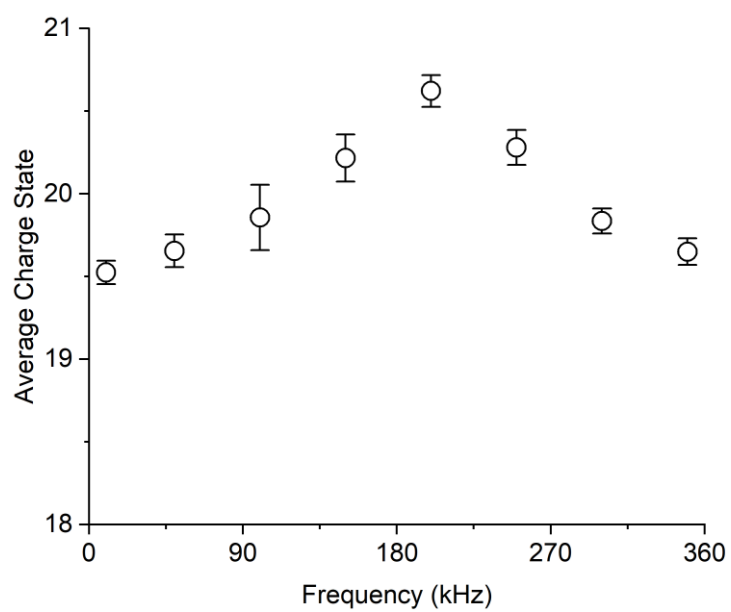

**Figure S2.** Average charge state calculated for myoglobin (5  $\mu\text{M}$ ) at different frequencies ranging from 10 to 350 kHz by pulsed nESI mass spectrometry.

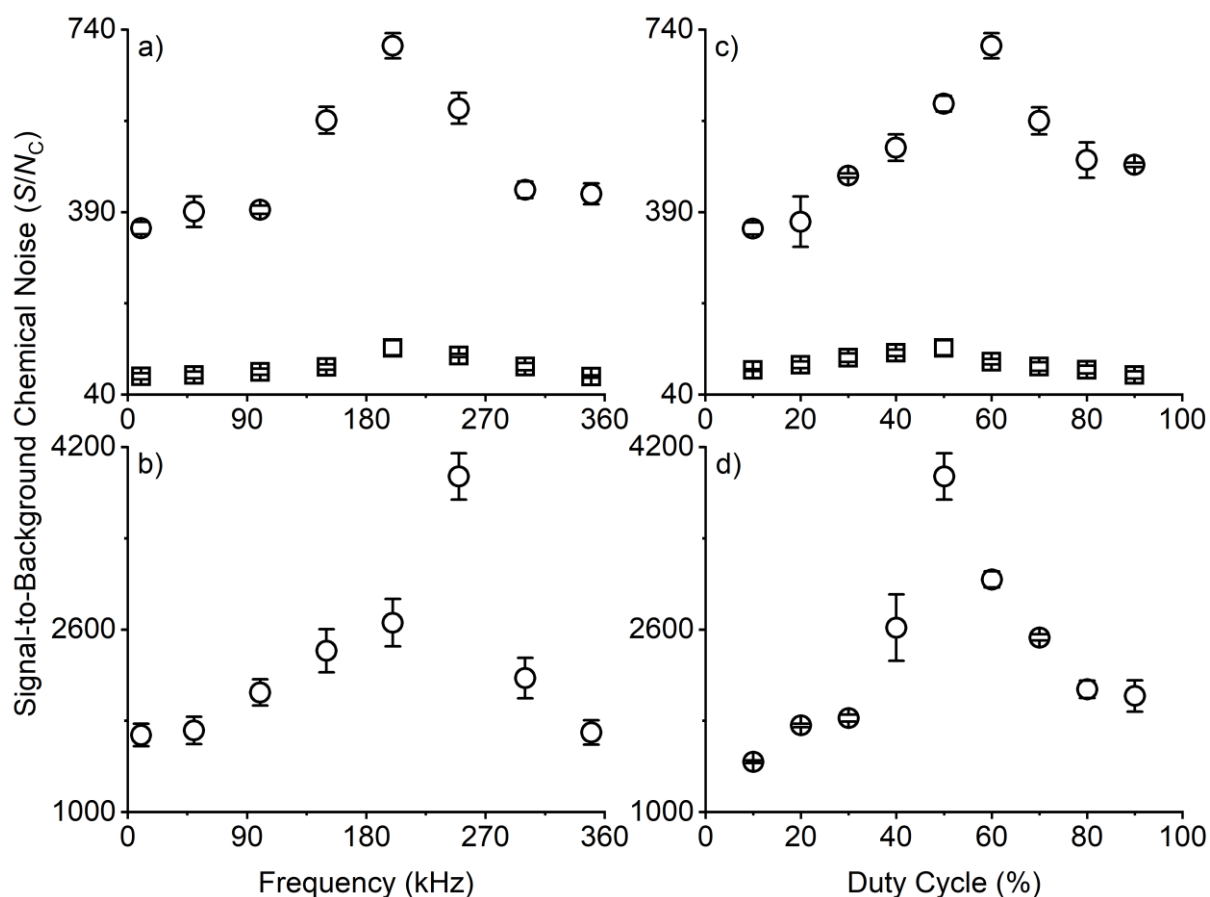

**Figure S3.** Signal-to-background chemical noise ( $S/N_C$ ) of (a, c) myoglobin (5  $\mu$ M) and (b, d) angiotensin II (1  $\mu$ M) as a function of (a, b) frequency and (c, d) duty cycle of pulsed nESI. The spectra were collected at a frequency ranging from 10 to 350 kHz (duty cycle of 50%) and duty cycle ranging from 10 to 90% (frequency of 250 and 200 kHz for angiotensin II and myoglobin, respectively). The  $S/N_C$  calculated for angiotensin II and myoglobin is presented in circle symbol ( $\circ$ ), whereas  $S/N_C$  of heme group from myoglobin is presented in square symbol ( $\square$ ).

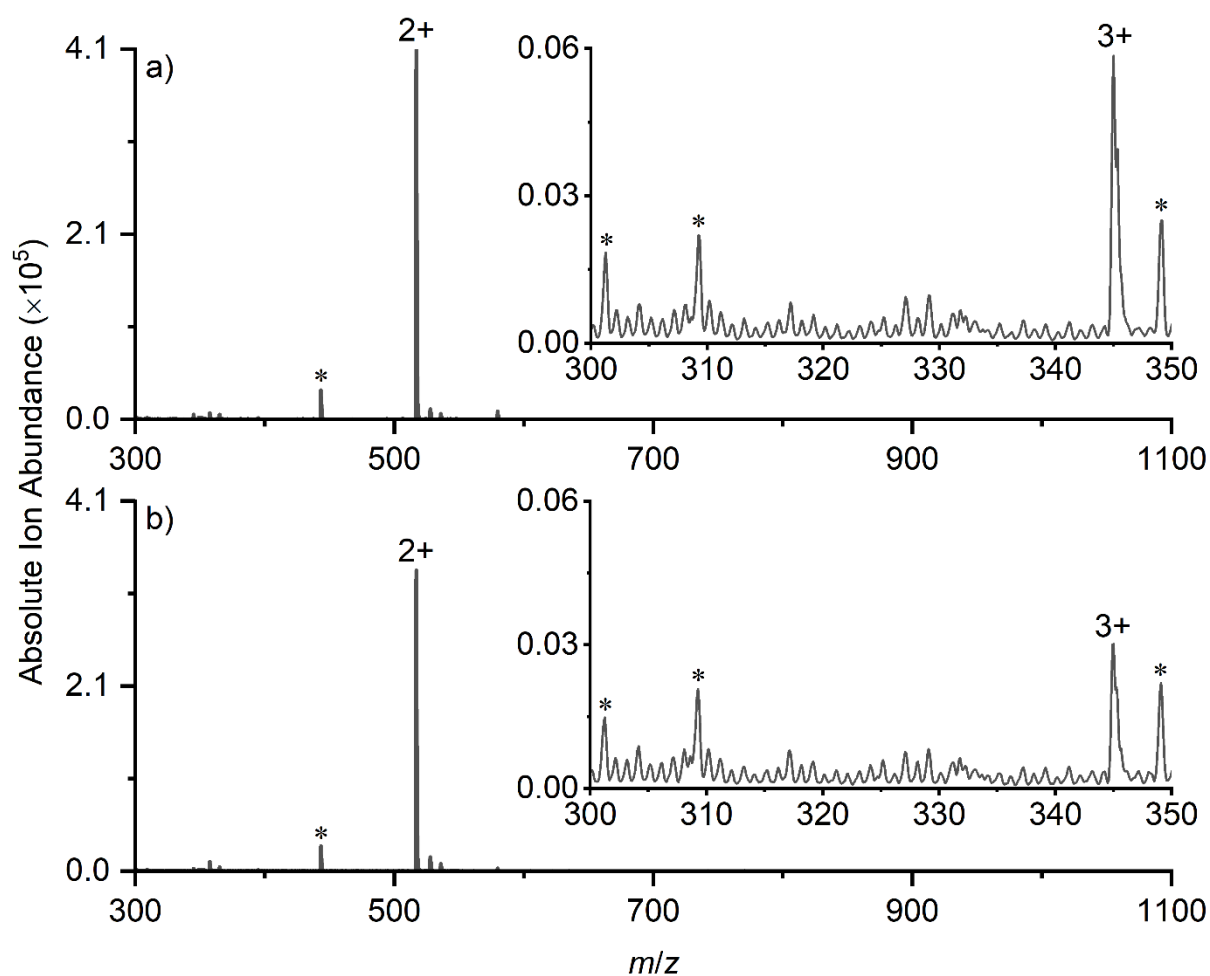

**Figure S4.** Mass spectra of angiotensin II (1  $\mu\text{M}$ ) obtained from pulsed (a) and conventional direct current nESI (b), respectively. Pulsed nESI spectrum was collected at an ‘optimum’ frequency of 250 kHz. The symbol asterisks (\*) indicate peaks corresponding to chemical noise that are present in the solution blank.
